# Supplementary material for: S-shaped decanuclear heterometallic [Ni8Ln2] complexes [Ln(iii) = Gd, Tb, Dy and Ho]: theoretical modeling of the magnetic properties of the gadolinium analogue
Source: Royal Society of Chemistry journal article supplement (doi:10.1039/c4dt00465e), 2014-01-01
Supplement: c4dt00465e1.pdf [file c4dt00465e1.pdf]

## *Supporting Information*

### **S-Shaped Decanuclear Heterometallic [Ni<sub>8</sub>Ln<sub>2</sub>] Complexes [Ln = Tb(III), Dy(III), Gd(III) and Ho(III)]. Theoretical Modeling of the Magnetic Properties of the Gadolinium Analogue**

*Sakiat Hossain,<sup>a</sup> Sourav Das,<sup>a</sup> Amit Chakraborty,<sup>a</sup> Francesc Lloret<sup>\*b</sup>, Joan Cano,<sup>b</sup> Emilio Pardo<sup>b</sup> and Vadapalli Chandrasekhar,<sup>\*a,c</sup>*

<sup>a</sup>Department of Chemistry, Indian Institute of Technology Kanpur, Kanpur-208016, India

<sup>b</sup>Departament de Química Inorgànica, Instituto de Ciencia Molecular (ICMOL), Universitat de València, 46980 Paterna, València, Spain

<sup>c</sup>National Institute of Science Education and Research, Institute of Physics Campus, Sachivalaya Marg, Bhubaneswar-751 005, India

AUTHOR EMAIL ADDRESS: [vc@iitk.ac.in](mailto:vc@iitk.ac.in)(V.C), [francisco.lloret@uv.es](mailto:francisco.lloret@uv.es) (F.L)

## Computational Details

Calculations were performed through the Gaussian09 package using the B3LYP functional and the quadratic convergence approach.<sup>i,iii,iii,iv</sup> An approach based on the use of broken-symmetry (BS) functions built from localized orbitals can be used to evaluate the energies of several spin states for systems with two or more paramagnetic centers that interact weakly.<sup>v, vi, vii</sup> These BS functions provide positive and negative spin densities on the paramagnetic centers and are equivalent to those expected in a mononuclear complex, *i.e.* when only one paramagnetic center is present. In the present paper, the BS functions were obtained from the guess functions generated with the fragment tool implemented in Gaussian09. A full geometry was used for complex Gd<sub>2</sub>Ni<sub>8</sub>, while Gd(III) ions were replaced by Sc(III) or La(III) ions on models Sc<sub>2</sub>Ni<sub>8</sub> and La<sub>2</sub>Ni<sub>8</sub>, respectively. Several basis sets were employed in the calculations on the electronic structure. Thus, in the Sc<sub>2</sub>Ni<sub>8</sub> model a triple-z and double-z all electron basis sets, as proposed by Ahlrichset *al.*, were used for the metal ions and for the rest of atoms, respectively, which has proven to be very efficient and accurate to evaluate magnetic couplings on inorganic materials.<sup>viii,ix</sup> Since there is not an equivalent basis set for the Lanthanum atom, a unique LanL2DZ basis set including Los Alamos' *effective core potentials* (ECP) was employed for all atoms in the La<sub>2</sub>Ni<sub>8</sub> model.<sup>x,xi,xii,xiii</sup> Finally, an all electron basis set with a contraction pattern (10 6432211/8442211/6421/411) obtained from an uncontracted basis set proposed by Nakajima was used for the Gadolinium atom in the study of the experimental Gd<sub>2</sub>Ni<sub>8</sub> complex due to, in previous works, it was shown very effective to predict the magnetic coupling constants on Gd(III) complexes.<sup>xiv</sup> In this case, to reach accurate results an Ahlrichs' triple- z was chosen for

the Nickel atoms, but it was only possible to reach the convergence requirements when a 6-31G basis set was used for non-metal atoms. In any case, similar magnetic couplings between Ni(II) ions were found in the three calculated systems.<sup>xv,xvi,xvii,xviii,xix,xx,xxi,xxii,xxiii</sup> In order to introduce relativistic effects, *RESC* scalar relativistic calculations were carried out; but the same  $J$  values were found when these effects were obviated.

Simulations of the magnetic curves in the  $\chi_M T$  vs  $T$  form were simulated neglecting magnetic anisotropy effects in nickel(II) ions (see discussion in the text). Thus, under this approach, exact simulations was obtained by diagonalization procedure of the energy matrix built from *Irreducible Tensor Operators (ITO)*<sup>xxiv</sup>, which greatly reduced the size of the matrices that was 5824x5824 for the biggest one corresponding to the  $S = 4$  block for a total of 40488 states from  $S = 15$  to  $S = 0$ . Using *ITO* method only a  $g$  value can be used; nevertheless, we have applied the Wigner-Eckart Theorem<sup>xxv</sup> to obtain the  $g$  values for each spin state. This approach is valid only when the local  $g$  values are very similar, in particular, is accurate enough for  $g_A/g_B$  ratios less than 1.1, which it is our case. All simulations were done with the XVPMAG code.<sup>xxvi</sup>

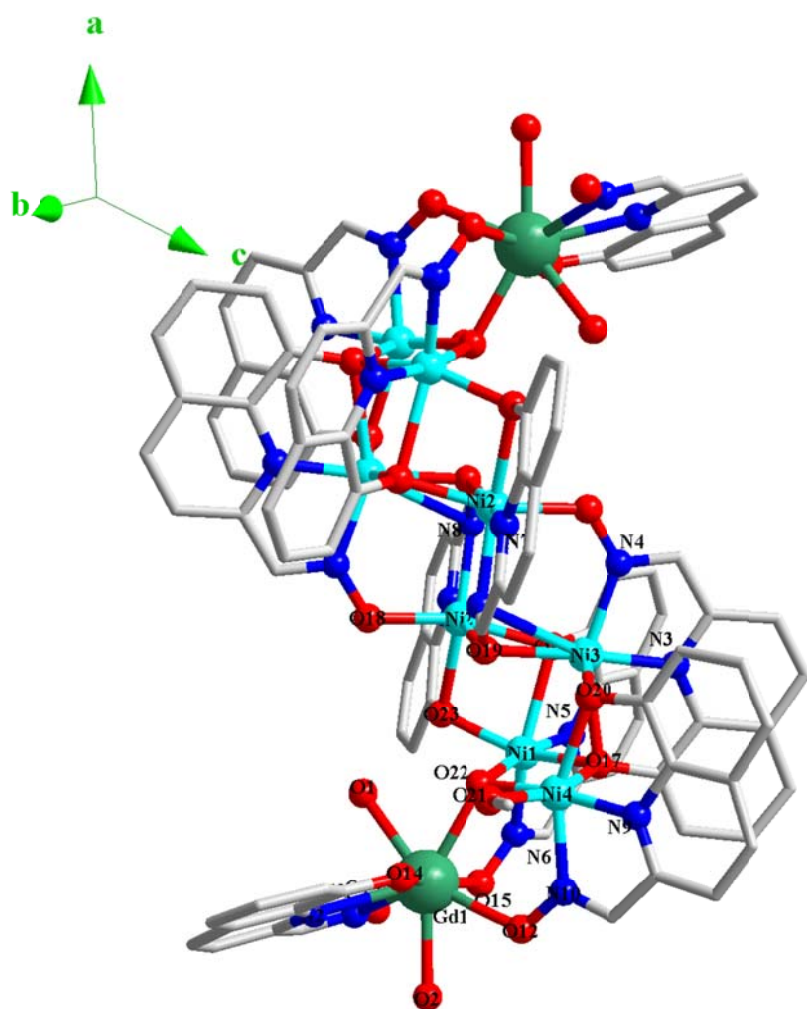

(A)

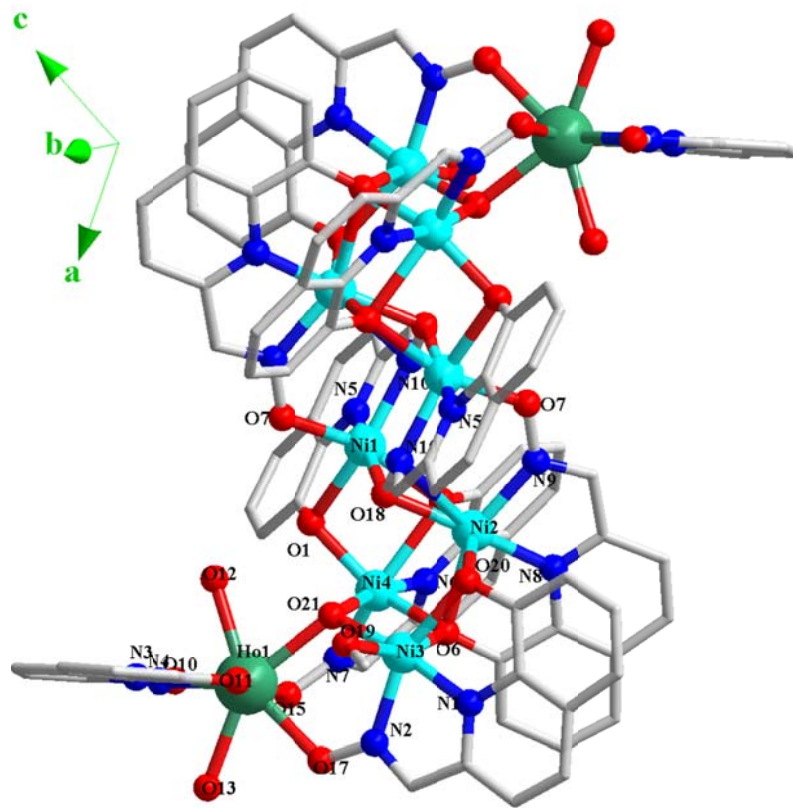

(B)

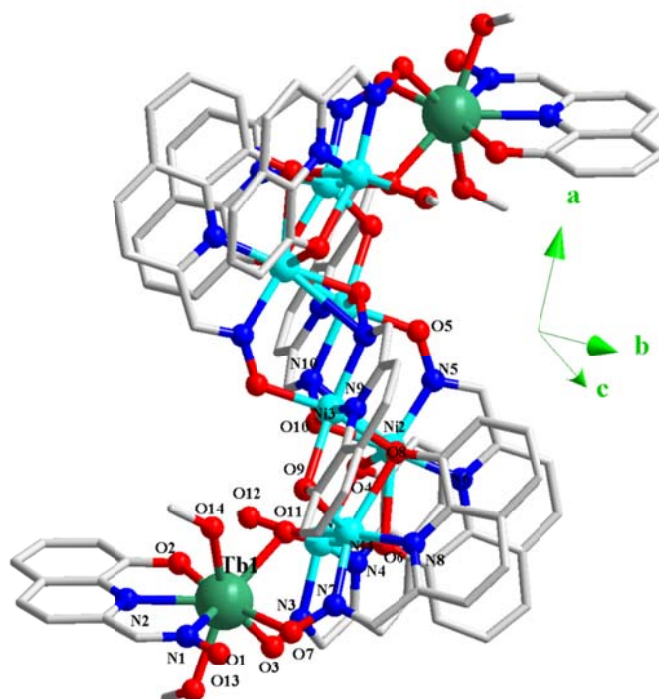

(C)

Figure S1. All hydrogen atoms, counter anion and solvent molecules have been omitted for clarity of compound 2, 3 and 4.

Table S1. BVS<sup>xxvii</sup> Calculation Values for Selected Oxygen Atoms in complexes (1-4)

| Compound | Atom | BVS   | Assignment      |
|----------|------|-------|-----------------|
| 1        | O8   | 1.025 | OH <sup>-</sup> |
| 2        | O22  | 1.035 | OH <sup>-</sup> |
| 3        | O21  | 1.062 | OH <sup>-</sup> |
| 4        | O11  | 1.017 | OH <sup>-</sup> |

Table S3. Bond lengths and bond angles of complex **1**

| Coordination environment around Dy metal                                           | Bond lengths [Å]            |                  | Bond Angles [°]   |                 |
|------------------------------------------------------------------------------------|-----------------------------|------------------|-------------------|-----------------|
| 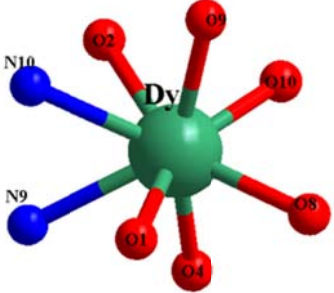 | Dy(1)-O(4)                  | 2.265(14)        | O(4)-Dy(1)-O(10)  | 83.6(5)         |
|                                                                                    | Dy(1)-O(10)                 | 2.334(14)        | O(4)-Dy(1)-O(9)   | 162.2(5)        |
|                                                                                    | Dy(1)-O(9)                  | 2.344(12)        | O(10)-Dy(1)-O(9)  | 81.3(4)         |
|                                                                                    | Dy(1)-O(8)                  | 2.360(12)        | O(4)-Dy(1)-O(8)   | 81.7(4)         |
|                                                                                    | Dy(1)-O(1)                  | 2.391(12)        | O(10)-Dy(1)-O(8)  | 82.7(4)         |
|                                                                                    | Dy(1)-O(2)                  | 2.391(14)        | O(9)-Dy(1)-O(8)   | 86.9(4)         |
|                                                                                    | Dy(1)-N(9)                  | 2.467(18)        | O(4)-Dy(1)-O(1)   | 96.4(5)         |
|                                                                                    | Dy(1)-N(10)                 | 2.585(17)        | O(10)-Dy(1)-O(1)  | 152.8(4)        |
|                                                                                    |                             |                  | O(9)-Dy(1)-O(1)   | 92.7(4)         |
|                                                                                    |                             |                  | O(8)-Dy(1)-O(1)   | 70.4(4)         |
|                                                                                    |                             |                  | O(4)-Dy(1)-O(2)   | 102.0(5)        |
|                                                                                    |                             |                  | O(10)-Dy(1)-O(2)  | 68.1(5)         |
|                                                                                    |                             |                  | O(9)-Dy(1)-O(2)   | 81.1(5)         |
|                                                                                    |                             |                  | O(8)-Dy(1)-O(2)   | 149.7(4)        |
|                                                                                    |                             |                  | O(1)-Dy(1)-O(2)   | 137.4(5)        |
|                                                                                    |                             |                  | O(4)-Dy(1)-N(9)   | 66.7(6)         |
|                                                                                    |                             |                  | O(10)-Dy(1)-N(9)  | 128.4(5)        |
|                                                                                    |                             |                  | O(9)-Dy(1)-N(9)   | 130.8(5)        |
|                                                                                    |                             |                  | O(8)-Dy(1)-N(9)   | 129.5(5)        |
|                                                                                    |                             |                  | O(1)-Dy(1)-N(9)   | 74.9(5)         |
|                                                                                    |                             |                  | O(2)-Dy(1)-N(9)   | 77.7(5)         |
|                                                                                    |                             |                  | O(4)-Dy(1)-N(10)  | 129.5(5)        |
|                                                                                    |                             |                  | O(10)-Dy(1)-N(10) | 129.9(5)        |
|                                                                                    |                             |                  | O(9)-Dy(1)-N(10)  | 68.1(5)         |
|                                                                                    |                             |                  | O(8)-Dy(1)-N(10)  | 131.5(4)        |
|                                                                                    |                             |                  | O(1)-Dy(1)-N(10)  | 70.0(5)         |
|                                                                                    |                             |                  | O(2)-Dy(1)-N(10)  | 68.7(5)         |
|                                                                                    | Environment around Ni metal | Bond lengths [Å] |                   | Bond Angles [°] |

|                                                                                     |              |                     |                    |          |
|-------------------------------------------------------------------------------------|--------------|---------------------|--------------------|----------|
| 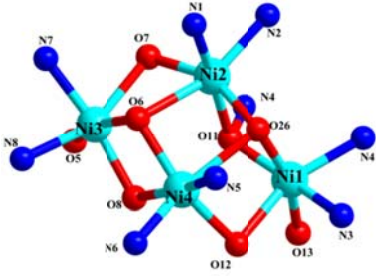   | N(1)-Ni(2)#1 | 1.987(14)           | N(3)-Ni(1)-O(13)   | 97.8(6)  |
|                                                                                     | N(2)-Ni(2)#1 | 2.065(15)           | N(3)-Ni(1)-O(11)   | 168.8(5) |
|                                                                                     | N(3)-Ni(1)   | 1.968(14)           | O(13)-Ni(1)-O(11)  | 91.8(5)  |
|                                                                                     | N(4)-Ni(1)   | 2.061(13)           | N(3)-Ni(1)-N(4)    | 77.6(6)  |
|                                                                                     | N(5)-Ni(4)   | 2.025(13)           | O(13)-Ni(1)-N(4)   | 96.5(5)  |
|                                                                                     | N(6)-Ni(4)   | 2.039(15)           | O(11)-Ni(1)-N(4)   | 107.2(5) |
|                                                                                     | N(7)-Ni(3)   | 2.011(17)           | N(3)-Ni(1)-O(26)   | 92.7(5)  |
|                                                                                     | N(8)-Ni(3)   | 2.070(16)           | O(13)-Ni(1)-O(26)  | 163.6(5) |
|                                                                                     | Ni(1)-O(13)  | 1.998(12)           | O(11)-Ni(1)-O(26)  | 76.7(4)  |
|                                                                                     | Ni(1)-O(11)  | 2.026(12)           | N(4)-Ni(1)-O(26)   | 98.0(5)  |
|                                                                                     | Ni(1)-O(26)  | 2.068(11)           | N(3)-Ni(1)-O(12)   | 76.8(5)  |
|                                                                                     | Ni(1)-O(12)  | 2.265(12)           | O(13)-Ni(1)-O(12)  | 87.1(5)  |
|                                                                                     | Ni(2)-O(7)   | 1.974(11)           | O(11)-Ni(1)-O(12)  | 98.0(5)  |
|                                                                                     | Ni(2)-O(26)  | 1.983(10)           | N(4)-Ni(1)-O(12)   | 154.4(5) |
|                                                                                     | Ni(2)-N(1)#1 | 1.987(14)           | O(26)-Ni(1)-O(12)  | 83.0(4)  |
|                                                                                     | Ni(2)-N(2)#1 | 2.065(15)           | O(7)-Ni(2)-O(26)   | 153.0(5) |
|                                                                                     | Ni(2)-O(11)  | 2.126(11)           | O(7)-Ni(2)-N(1)#1  | 96.2(5)  |
|                                                                                     | Ni(3)-O(8)   | 2.038(12)           | O(26)-Ni(2)-N(1)#1 | 98.9(5)  |
|                                                                                     | Ni(3)-O(6)   | 2.078(11)           | O(7)-Ni(2)-N(2)#1  | 103.9(5) |
|                                                                                     | Ni(3)-O(5)   | 2.089(12)           | O(26)-Ni(2)-N(2)#1 | 100.7(5) |
| Ni(3)-O(7)                                                                          | 2.195(12)    | N(1)#1-Ni(2)-N(2)#1 | 79.7(6)            |          |
| Ni(4)-O(12)                                                                         | 2.020(13)    | O(7)-Ni(2)-O(11)    | 86.7(5)            |          |
| Ni(4)-O(6)                                                                          | 2.036(12)    | O(26)-Ni(2)-O(11)   | 76.3(4)            |          |
| Ni(4)-O(8)                                                                          | 2.090(11)    | N(1)#1-Ni(2)-O(11)  | 173.6(5)           |          |
| Ni(4)-O(26)                                                                         | 2.394(11)    | N(2)#1-Ni(2)-O(11)  | 105.1(5)           |          |
|  |              |                     | N(7)-Ni(3)-O(8)    | 169.2(6) |
|                                                                                     |              |                     | N(7)-Ni(3)-N(8)    | 78.5(7)  |
|                                                                                     |              |                     | O(8)-Ni(3)-N(8)    | 91.9(6)  |
|                                                                                     |              |                     | N(7)-Ni(3)-O(6)    | 99.3(5)  |
|                                                                                     |              |                     | O(8)-Ni(3)-O(6)    | 77.1(4)  |
|                                                                                     |              |                     | N(8)-Ni(3)-O(6)    | 99.2(5)  |
|                                                                                     |              |                     | N(7)-Ni(3)-O(5)    | 95.5(6)  |
|                                                                                     |              |                     | O(8)-Ni(3)-O(5)    | 89.9(5)  |
|                                                                                     |              |                     | N(8)-Ni(3)-O(5)    | 92.8(5)  |
|                                                                                     |              |                     | O(6)-Ni(3)-O(5)    | 162.5(5) |



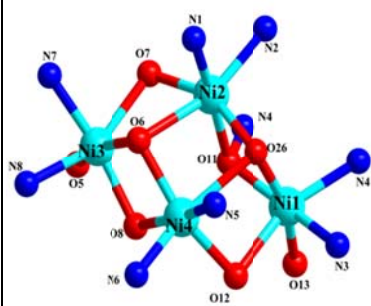

|                    |           |
|--------------------|-----------|
| N(7)-Ni(3)-O(7)    | 77.0(6)   |
| O(8)-Ni(3)-O(7)    | 112.3(5)  |
| N(8)-Ni(3)-O(7)    | 155.5(6)  |
| O(6)-Ni(3)-O(7)    | 83.4(4)   |
| O(5)-Ni(3)-O(7)    | 91.0(5)   |
| O(12)-Ni(4)-N(5)   | 99.1(5)   |
| O(12)-Ni(4)-O(6)   | 152.8(5)  |
| N(5)-Ni(4)-O(6)    | 96.9(5)   |
| O(12)-Ni(4)-N(6)   | 99.0(5)   |
| N(5)-Ni(4)-N(6)    | 78.7(6)   |
| O(6)-Ni(4)-N(6)    | 105.7(5)  |
| O(12)-Ni(4)-O(8)   | 89.3(5)   |
| N(5)-Ni(4)-O(8)    | 170.8(5)  |
| O(6)-Ni(4)-O(8)    | 76.9(4)   |
| N(6)-Ni(4)-O(8)    | 96.3(5)   |
| O(12)-Ni(4)-O(26)  | 80.8(4)   |
| N(5)-Ni(4)-O(26)   | 73.6(5)   |
| O(6)-Ni(4)-O(26)   | 82.8(4)   |
| N(6)-Ni(4)-O(26)   | 151.9(5)  |
| O(8)-Ni(4)-O(26)   | 111.8(4)  |
| Ni(4)-O(6)-Ni(3)   | 103.2(5)  |
| Ni(2)-O(7)-Ni(3)   | 97.2(5)   |
| Ni(3)-O(8)-Ni(4)   | 102.7(5)  |
| Ni(3)-O(8)-Dy(1)   | 115.4(5)  |
| Ni(4)-O(8)-Dy(1)   | 110.6(5)  |
| N(6)-O(9)-Dy(1)    | 117.5(10) |
| N(8)-O(10)-Dy(1)   | 118.3(11) |
| N(4)#1-O(11)-Ni(1) | 118.5(10) |
| N(4)#1-O(11)-Ni(2) | 99.3(9)   |
| Ni(1)-O(11)-Ni(2)  | 100.4(5)  |
| Ni(4)-O(12)-Ni(1)  | 95.7(5)   |
| Ni(2)-O(26)-Ni(1)  | 103.9(4)  |
| Ni(2)-O(26)-Ni(4)  | 91.5(4)   |
| Ni(1)-O(26)-Ni(4)  | 90.7(4)   |

Table S4. Bond lengths and bond angles of complex2

| Environment around Gd metal                                                         | Bond lengths [Å] | Bond Angles [°] |                       |          |
|-------------------------------------------------------------------------------------|------------------|-----------------|-----------------------|----------|
| 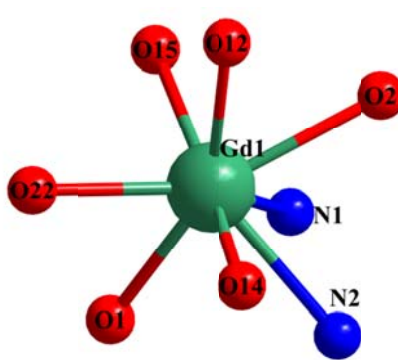 | Gd(1)-O(14)      | 2.295(15)       | O(14)-Gd(1)-O(12)#1   | 83.1(4)  |
|                                                                                     | Gd(1)-O(12)#1    | 2.369(11)       | O(14)-Gd(1)-O(22)#1   | 83.3(4)  |
|                                                                                     | Gd(1)-O(22)#1    | 2.387(11)       | O(12)#1-Gd(1)-O(22)#1 | 83.3(4)  |
|                                                                                     | Gd(1)-O(15)      | 2.395(12)       | O(14)-Gd(1)-O(15)     | 162.8(5) |
|                                                                                     | Gd(1)-O(1)       | 2.401(9)        | O(12)#1-Gd(1)-O(15)   | 82.0(4)  |
|                                                                                     | Gd(1)-O(2)       | 2.434(11)       | O(22)#1-Gd(1)-O(15)   | 86.6(4)  |
|                                                                                     | Gd(1)-N(2)       | 2.497(17)       | O(14)-Gd(1)-O(1)      | 97.2(4)  |
|                                                                                     | Gd(1)-N(1)       | 2.601(18)       | O(12)#1-Gd(1)-O(1)    | 152.7(4) |
|                                                                                     |                  |                 | O(22)#1-Gd(1)-O(1)    | 69.7(4)  |
|                                                                                     |                  |                 | O(15)-Gd(1)-O(1)      | 92.1(4)  |
|                                                                                     |                  |                 | O(14)-Gd(1)-O(2)      | 100.6(5) |
|                                                                                     |                  |                 | O(12)#1-Gd(1)-O(2)    | 68.1(4)  |
|                                                                                     |                  |                 | O(22)#1-Gd(1)-O(2)    | 150.3(4) |
|                                                                                     |                  |                 | O(15)-Gd(1)-O(2)      | 81.7(4)  |
|                                                                                     |                  |                 | O(1)-Gd(1)-O(2)       | 137.6(4) |
|                                                                                     |                  |                 | O(14)-Gd(1)-N(2)      | 67.3(6)  |
|                                                                                     |                  |                 | O(12)#1-Gd(1)-N(2)    | 128.7(5) |
|                                                                                     |                  |                 | O(22)#1-Gd(1)-N(2)    | 130.1(5) |
|                                                                                     |                  |                 | O(15)-Gd(1)-N(2)      | 129.3(6) |
|                                                                                     |                  |                 | O(1)-Gd(1)-N(2)       | 74.9(5)  |
|                                                                                     |                  | O(2)-Gd(1)-N(2) | 77.1(4)               |          |

|                                                 |                         |                        |                       |          |
|-------------------------------------------------|-------------------------|------------------------|-----------------------|----------|
|                                                 |                         | O(14)-Gd(1)-N(1)       | 128.7(6)              |          |
|                                                 |                         | O(12)#1-Gd(1)-N(1)     | 129.9(5)              |          |
|                                                 |                         | O(22)#1-Gd(1)-N(1)     | 131.2(4)              |          |
|                                                 |                         | O(15)-Gd(1)-N(1)       | 68.1(5)               |          |
|                                                 |                         | O(1)-Gd(1)-N(1)        | 70.3(5)               |          |
|                                                 |                         | O(2)-Gd(1)-N(1)        | 68.4(5)               |          |
|                                                 |                         | N(2)-Gd(1)-N(1)        | 61.4(7)               |          |
| <b>Coordination environment around Ni metal</b> | <b>Bond lengths [Å]</b> | <b>Bond Angles [°]</b> |                       |          |
|                                                 | N(3)-Ni(3)#1            | 1.973(13)              | N(5)-Ni(1)-O(23)      | 99.5(4)  |
|                                                 | N(4)-Ni(3)#1            | 2.055(15)              | N(5)-Ni(1)-N(6)       | 77.6(6)  |
|                                                 | N(5)-Ni(1)              | 1.992(13)              | O(23)-Ni(1)-N(6)      | 99.6(5)  |
|                                                 | N(6)-Ni(1)              | 2.032(16)              | N(5)-Ni(1)-O(17)      | 96.3(4)  |
|                                                 | N(7)-Ni(2)              | 1.938(13)              | O(23)-Ni(1)-O(17)     | 152.9(4) |
|                                                 | N(8)-Ni(2)              | 2.056(13)              | N(6)-Ni(1)-O(17)      | 105.3(4) |
|                                                 | N(9)-Ni(4)              | 1.977(14)              | N(5)-Ni(1)-O(22)#1    | 170.9(4) |
|                                                 | N(10)-Ni(4)             | 2.065(14)              | O(23)-Ni(1)-O(22)#1   | 88.6(4)  |
|                                                 | Ni(1)-O(23)             | 2.021(10)              | N(6)-Ni(1)-O(22)#1    | 97.1(5)  |
|                                                 | Ni(1)-O(17)             | 2.044(10)              | O(17)-Ni(1)-O(22)#1   | 77.8(4)  |
|                                                 | Ni(1)-O(22)#1           | 2.071(10)              | N(5)-Ni(1)-O(16)      | 74.4(5)  |
|                                                 | Ni(1)-O(16)             | 2.370(10)              | O(23)-Ni(1)-O(16)     | 80.4(4)  |
|                                                 | Ni(2)-O(18)#1           | 2.018(10)              | N(6)-Ni(1)-O(16)      | 151.6(5) |
|                                                 | Ni(2)-O(19)#1           | 2.046(10)              | O(17)-Ni(1)-O(16)     | 82.9(4)  |
|                                                 | Ni(2)-O(16)             | 2.065(9)               | O(22)#1-Ni(1)-O(16)   | 111.3(4) |
|                                                 | Ni(2)-O(23)             | 2.259(11)              | N(7)-Ni(2)-O(18)#1    | 99.0(5)  |
|                                                 | Ni(3)-O(20)             | 1.961(10)              | N(7)-Ni(2)-O(19)#1    | 168.3(4) |
|                                                 | Ni(3)-N(3)#1            | 1.973(13)              | O(18)#1-Ni(2)-O(19)#1 | 90.9(4)  |
| Ni(3)-O(16)#1                                   | 1.981(10)               | N(7)-Ni(2)-N(8)        | 77.0(6)               |          |

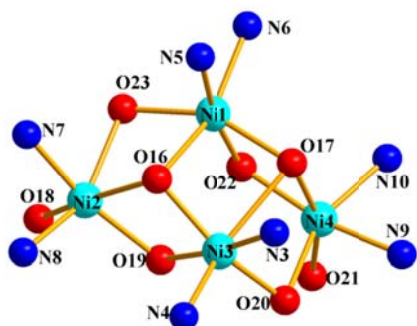

|               |           |                      |          |
|---------------|-----------|----------------------|----------|
| Ni(3)-N(4)#1  | 2.055(15) | O(18)#1-Ni(2)-N(8)   | 96.7(4)  |
| Ni(3)-O(19)   | 2.107(10) | O(19)#1-Ni(2)-N(8)   | 108.2(5) |
| Ni(4)-O(22)   | 2.048(11) | N(7)-Ni(2)-O(16)     | 92.8(4)  |
| Ni(4)-O(21)   | 2.058(12) | O(18)#1-Ni(2)-O(16)  | 162.2(4) |
| Ni(4)-O(17)#1 | 2.083(10) | O(19)#1-Ni(2)-O(16)  | 76.2(4)  |
| Ni(4)-O(20)   | 2.202(12) | N(8)-Ni(2)-O(16)     | 99.0(4)  |
| O(16)-Ni(3)#1 | 1.981(10) | N(7)-Ni(2)-O(23)     | 77.6(5)  |
| O(17)-Ni(4)#1 | 2.083(10) | O(18)#1-Ni(2)-O(23)  | 87.3(4)  |
| O(18)-Ni(2)#1 | 2.017(10) | O(19)#1-Ni(2)-O(23)  | 96.8(4)  |
| O(19)-Ni(2)#1 | 2.046(10) | N(8)-Ni(2)-O(23)     | 154.6(5) |
| O(22)-Ni(1)#1 | 2.071(10) | O(16)-Ni(2)-O(23)    | 82.2(4)  |
|               |           | O(20)-Ni(3)-N(3)#1   | 96.3(5)  |
|               |           | O(20)-Ni(3)-O(16)#1  | 152.3(5) |
|               |           | N(3)#1-Ni(3)-O(16)#1 | 98.7(5)  |
|               |           | O(20)-Ni(3)-N(4)#1   | 104.6(5) |
|               |           | N(3)#1-Ni(3)-N(4)#1  | 78.9(6)  |
|               |           | O(16)#1-Ni(3)-N(4)#1 | 101.0(5) |
|               |           | O(20)-Ni(3)-O(19)    | 86.3(4)  |
|               |           | N(3)#1-Ni(3)-O(19)   | 173.6(6) |
|               |           | O(16)#1-Ni(3)-O(19)  | 76.6(4)  |
|               |           | N(4)#1-Ni(3)-O(19)   | 106.1(5) |
|               |           | N(9)-Ni(4)-O(22)     | 169.5(5) |
|               |           | N(9)-Ni(4)-O(21)     | 98.1(5)  |
|               |           | O(22)-Ni(4)-O(21)    | 88.1(5)  |
|               |           | N(9)-Ni(4)-N(10)     | 77.9(6)  |
|               |           | O(22)-Ni(4)-N(10)    | 93.3(5)  |

|  |  |                       |           |
|--|--|-----------------------|-----------|
|  |  | O(21)-Ni(4)-N(10)     | 94.1(5)   |
|  |  | N(9)-Ni(4)-O(17)#1    | 98.1(5)   |
|  |  | O(22)-Ni(4)-O(17)#1   | 77.4(4)   |
|  |  | O(21)-Ni(4)-O(17)#1   | 161.5(4)  |
|  |  | N(10)-Ni(4)-O(17)#1   | 98.1(5)   |
|  |  | N(9)-Ni(4)-O(20)      | 77.4(5)   |
|  |  | O(22)-Ni(4)-O(20)     | 111.2(4)  |
|  |  | O(21)-Ni(4)-O(20)     | 91.0(5)   |
|  |  | N(10)-Ni(4)-O(20)     | 155.2(5)  |
|  |  | O(17)#1-Ni(4)-O(20)   | 83.8(4)   |
|  |  | Ni(3)#1-O(16)-Ni(2)   | 103.7(4)  |
|  |  | Ni(3)#1-O(16)-Ni(1)   | 92.4(4)   |
|  |  | Ni(2)-O(16)-Ni(1)     | 91.9(4)   |
|  |  | Ni(1)-O(17)-Ni(4)#1   | 102.2(5)  |
|  |  | N(4)-O(18)-Ni(2)#1    | 123.9(10) |
|  |  | N(8)-O(19)-Ni(2)#1    | 117.4(8)  |
|  |  | N(8)-O(19)-Ni(3)      | 99.9(8)   |
|  |  | Ni(2)#1-O(19)-Ni(3)   | 100.0(4)  |
|  |  | Ni(3)-O(20)-Ni(4)     | 97.3(5)   |
|  |  | Ni(4)-O(22)-Ni(1)#1   | 102.5(5)  |
|  |  | Ni(4)-O(22)-Gd(1)#1   | 113.8(4)  |
|  |  | Ni(1)#1-O(22)-Gd(1)#1 | 110.4(5)  |
|  |  | Ni(1)-O(23)-Ni(2)     | 96.4(5)   |

Table S5. Bond lengths and bond angles of complex **3**

| Coordination environment around Ho | Bond lengths [Å] | Bond angles [°] |
|------------------------------------|------------------|-----------------|
|------------------------------------|------------------|-----------------|

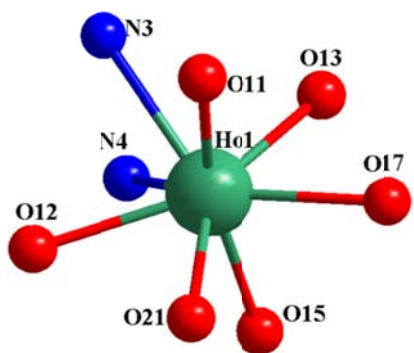

|                       |                            |
|-----------------------|----------------------------|
| Ho(1)-O(11) 2.276(12) | O(11)-Ho(1)-O(15) 161.2(3) |
| Ho(1)-O(15) 2.316(11) | O(11)-Ho(1)-O(17) 81.9(4)  |
| Ho(1)-O(17) 2.351(10) | O(15)-Ho(1)-O(17) 81.8(3)  |
| Ho(1)-O(12) 2.367(10) | O(11)-Ho(1)-O(12) 97.3(4)  |
| Ho(1)-O(21) 2.378(9)  | O(15)-Ho(1)-O(12) 92.8(3)  |
| Ho(1)-O(13) 2.399(11) | O(17)-Ho(1)-O(12) 152.6(3) |
| Ho(1)-N(3) 2.477(14)  | O(11)-Ho(1)-O(21) 81.9(3)  |
| Ho(1)-N(4) 2.576(15)  | O(15)-Ho(1)-O(21) 86.6(3)  |
|                       | O(17)-Ho(1)-O(21) 82.0(3)  |
|                       | O(12)-Ho(1)-O(21) 70.8(3)  |
|                       | O(11)-Ho(1)-O(13) 100.1(4) |
|                       | O(15)-Ho(1)-O(13) 82.4(4)  |
|                       | O(17)-Ho(1)-O(13) 68.1(4)  |
|                       | O(12)-Ho(1)-O(13) 138.1(4) |
|                       | O(21)-Ho(1)-O(13) 149.2(3) |
|                       | O(11)-Ho(1)-N(3) 68.1(5)   |
|                       | O(15)-Ho(1)-N(3) 130.2(5)  |
|                       | O(17)-Ho(1)-N(3) 128.7(4)  |
|                       | O(12)-Ho(1)-N(3) 74.5(4)   |
|                       | O(21)-Ho(1)-N(3) 130.1(4)  |
|                       | O(13)-Ho(1)-N(3) 77.3(4)   |
|                       | O(11)-Ho(1)-N(4) 129.9(5)  |
|                       | O(15)-Ho(1)-N(4) 68.6(4)   |

|                                           |                         |                        |                     |          |
|-------------------------------------------|-------------------------|------------------------|---------------------|----------|
|                                           |                         | O(17)-Ho(1)-N(4)       | 130.4(4)            |          |
|                                           |                         | O(12)-Ho(1)-N(4)       | 70.3(4)             |          |
|                                           |                         | O(21)-Ho(1)-N(4)       | 132.1(4)            |          |
|                                           |                         | O(13)-Ho(1)-N(4)       | 69.3(4)             |          |
|                                           |                         | N(3)-Ho(1)-N(4)        | 61.8(6)             |          |
| <b>Coordination environment around Ni</b> | <b>Bond lengths [Å]</b> | <b>Bond angles [°]</b> |                     |          |
|                                           | N(1)-Ni(3)              | 1.991(12)              | N(5)-Ni(1)-O(7)     | 99.0(4)  |
|                                           | N(2)-Ni(3)              | 2.049(12)              | N(5)-Ni(1)-O(18)    | 168.4(4) |
|                                           | N(5)-Ni(1)              | 1.970(11)              | O(7)-Ni(1)-O(18)    | 90.8(3)  |
|                                           | N(6)-Ni(4)              | 2.000(12)              | N(5)-Ni(1)-N(10)#1  | 77.5(5)  |
|                                           | N(7)-Ni(4)              | 2.031(13)              | O(7)-Ni(1)-N(10)#1  | 96.6(4)  |
|                                           | N(8)-Ni(2)#             | 1.982(11)              | O(18)-Ni(1)-N(10)#1 | 107.6(4) |
|                                           | N(9)-Ni(2)#1            | 2.051(11)              | N(5)-Ni(1)-O(14)    | 92.5(4)  |
|                                           | N(10)-Ni(1)#1           | 2.06(12)               | O(7)-Ni(1)-O(14)    | 162.4(4) |
|                                           | Ni(1)-O(7)              | 2.017(8)               | O(18)-Ni(1)-O(14)   | 76.6(3)  |
|                                           | Ni(1)-O(18)             | 2.039(9)               | N(10)#1-Ni(1)-O(14) | 99.0(4)  |
|                                           | Ni(1)-N(10)#1           | 2.06(12)               | N(5)-Ni(1)-O(1)     | 76.6(4)  |
|                                           | Ni(1)-O(14)             | 2.091(8)               | O(7)-Ni(1)-O(1)     | 87.5(4)  |
|                                           | Ni(1)-O(1)              | 2.279(9)               | O(18)-Ni(1)-O(1)    | 97.9(4)  |
|                                           | Ni(2)-O(20)             | 1.965(9)               | N(10)#1-Ni(1)-O(1)  | 154.1(4) |
|                                           | Ni(2)-N(8)#1            | 1.98(11)               | O(14)-Ni(1)-O(1)    | 82.2(3)  |
|                                           | Ni(2)-O(14)             | 1.992(8)               | O(20)-Ni(2)-N(8)#1  | 96.0(4)  |
|                                           | Ni(2)-N(9)#1            | 2.05(11)               | O(20)-Ni(2)-O(14)   | 153.4(4) |

|                                                                                     |              |                    |                     |          |
|-------------------------------------------------------------------------------------|--------------|--------------------|---------------------|----------|
| 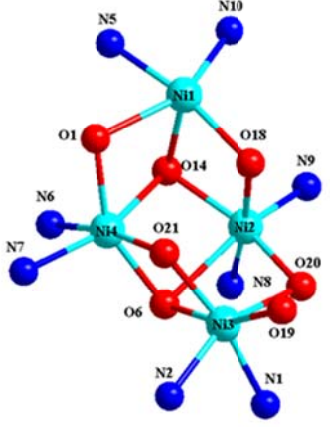  | Ni(2)-O(18)  | 2.105(9)           | N(8)#1-Ni(2)-O(14)  | 97.7(4)  |
|                                                                                     | Ni(3)-O(21)  | 2.026(9)           | O(20)-Ni(2)-N(9)#1  | 104.1(4) |
|                                                                                     | Ni(3)-O(19)  | 2.072(11)          | N(8)#1-Ni(2)-N(9)#1 | 79.1(5)  |
|                                                                                     | Ni(3)-O(6)#1 | 2.077(9)           | O(14)-Ni(2)-N(9)#1  | 100.8(4) |
|                                                                                     | Ni(3)-O(20)  | 2.228(9)           | O(20)-Ni(2)-O(18)   | 87.4(3)  |
|                                                                                     | Ni(4)-O(1)   | 2.031(9)           | N(8)#1-Ni(2)-O(18)  | 173.9(4) |
|                                                                                     | Ni(4)-O(6)#1 | 2.043(9)           | O(14)-Ni(2)-O(18)   | 77.3(3)  |
|                                                                                     | Ni(4)-O(21)  | 2.068(8)           | N(9)#1-Ni(2)-O(18)  | 105.1(4) |
|                                                                                     | Ni(4)-O(14)  | 2.387(9)           | N(1)-Ni(3)-O(21)    | 168.8(5) |
|                                                                                     | O(6)-Ni(4)#1 | 2.043(9)           | N(1)-Ni(3)-N(2)     | 77.6(5)  |
|                                                                                     | O(6)-Ni(3)#1 | 2.077(9)           | O(21)-Ni(3)-N(2)    | 92.7(4)  |
|                                                                                     |              |                    | N(1)-Ni(3)-O(19)    | 97.6(4)  |
|                                                                                     |              |                    | O(21)-Ni(3)-O(19)   | 88.5(4)  |
|                                                                                     |              |                    | N(2)-Ni(3)-O(19)    | 93.9(5)  |
|                                                                                     |              |                    | N(1)-Ni(3)-O(6)#1   | 98.4(4)  |
|                                                                                     |              |                    | O(21)-Ni(3)-O(6)#1  | 77.4(3)  |
|                                                                                     |              | N(2)-Ni(3)-O(6)#1  | 99.2(4)             |          |
|                                                                                     |              | O(19)-Ni(3)-O(6)#1 | 161.1(4)            |          |
|                                                                                     |              | N(1)-Ni(3)-O(20)   | 76.4(5)             |          |
|                                                                                     |              | O(21)-Ni(3)-O(20)  | 113.0(4)            |          |
|                                                                                     |              | N(2)-Ni(3)-O(20)   | 154.0(4)            |          |
|                                                                                     |              | O(19)-Ni(3)-O(20)  | 91.1(4)             |          |
|                                                                                     |              | O(6)#1-Ni(3)-O(20) | 83.1(3)             |          |
|  |              |                    |                     |          |



|  |  |                      |          |
|--|--|----------------------|----------|
|  |  | N(6)-Ni(4)-N(7)      | 78.6(5)  |
|  |  | N(6)-Ni(4)-O(1)      | 99.7(4)  |
|  |  | N(7)-Ni(4)-O(1)      | 99.2(4)  |
|  |  | N(6)-Ni(4)-O(6)#1    | 95.8(4)  |
|  |  | N(7)-Ni(4)-O(6)#1    | 106.5(4) |
|  |  | O(1)-Ni(4)-O(6)#1    | 152.1(4) |
|  |  | N(6)-Ni(4)-O(21)     | 170.1(4) |
|  |  | N(7)-Ni(4)-O(21)     | 96.4(5)  |
|  |  | O(1)-Ni(4)-O(21)     | 89.5(4)  |
|  |  | O(6)#1-Ni(4)-O(21)   | 77.2(4)  |
|  |  | N(6)-Ni(4)-O(14)     | 73.2(4)  |
|  |  | N(7)-Ni(4)-O(14)     | 151.3(4) |
|  |  | O(1)-Ni(4)-O(14)     | 80.8(3)  |
|  |  | O(6)#1-Ni(4)-O(14)   | 81.7(3)  |
|  |  | O(21)-Ni(4)-O(14)    | 112.2(3) |
|  |  | Ni(4)-O(1)-Ni(1)     | 96.1(4)  |
|  |  | Ni(4)#1-O(6)-Ni(3)#1 | 102.2(4) |
|  |  | N(9)-O(7)-Ni(1)      | 123.0(7) |
|  |  | Ni(2)-O(14)-Ni(1)    | 102.6(4) |
|  |  | Ni(2)-O(14)-Ni(4)    | 92.2(3)  |
|  |  | Ni(1)-O(14)-Ni(4)    | 91.3(3)  |
|  |  | Ni(2)-O(20)-Ni(3)    | 96.3(4)  |
|  |  | Ni(3)-O(21)-Ni(4)    | 103.1(4) |

|  |  |                            |
|--|--|----------------------------|
|  |  | Ni(3)-O(21)-Ho(1) 115.5(4) |
|  |  | Ni(4)-O(21)-Ho(1) 110.4(4) |

Table S6. Bond lengths and bond angles of complex4

| Coordination environment around Tb                                                  | Bond length[Å] |           | Bond angles [°]   |          |
|-------------------------------------------------------------------------------------|----------------|-----------|-------------------|----------|
| 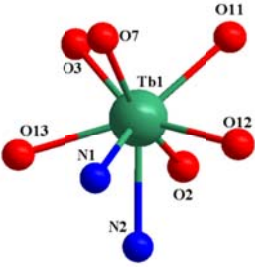 | N(1)-Tb(1)     | 2.587(14) | O(2)-Tb(1)-O(3)   | 87.2(4)  |
|                                                                                     | N(2)-Tb(1)     | 2.494(13) | O(2)-Tb(1)-O(7)   | 162.8(4) |
|                                                                                     | O(2)-Tb(1)     | 2.279(12) | O(3)-Tb(1)-O(7)   | 81.6(5)  |
|                                                                                     | O(3)-Tb(1)     | 2.352(12) | O(2)-Tb(1)-O(12)  | 94.3(5)  |
|                                                                                     | O(7)-Tb(1)     | 2.372(13) | O(3)-Tb(1)-O(12)  | 150.7(4) |
|                                                                                     | O(11)-Tb(1)    | 2.418(9)  | O(7)-Tb(1)-O(12)  | 89.3(5)  |
|                                                                                     | O(12)-Tb(1)    | 2.385(12) | O(2)-Tb(1)-O(11)  | 80.2(3)  |
|                                                                                     | O(13)-Tb(1)    | 2.425(13) | O(3)-Tb(1)-O(11)  | 81.7(3)  |
|                                                                                     |                |           | O(7)-Tb(1)-O(11)  | 85.3(3)  |
|                                                                                     |                |           | O(12)-Tb(1)-O(11) | 69.8(4)  |
|                                                                                     |                |           | O(2)-Tb(1)-O(13)  | 100.1(4) |
|                                                                                     |                |           | O(3)-Tb(1)-O(13)  | 68.7(4)  |

|                                       |                      |                   |          |
|---------------------------------------|----------------------|-------------------|----------|
|                                       |                      | O(7)-Tb(1)-O(13)  | 88.0(4)  |
|                                       |                      | O(12)-Tb(1)-O(13) | 139.0(5) |
|                                       |                      | O(11)-Tb(1)-O(13) | 150.4(4) |
|                                       |                      | O(2)-Tb(1)-N(2)   | 67.5(5)  |
|                                       |                      | O(3)-Tb(1)-N(2)   | 129.5(5) |
|                                       |                      | O(7)-Tb(1)-N(2)   | 129.6(5) |
|                                       |                      | O(12)-Tb(1)-N(2)  | 77.1(4)  |
|                                       |                      | O(11)-Tb(1)-N(2)  | 131.3(4) |
|                                       |                      | O(13)-Tb(1)-N(2)  | 73.5(5)  |
|                                       |                      | O(2)-Tb(1)-N(1)   | 129.0(4) |
|                                       |                      | O(3)-Tb(1)-N(1)   | 127.7(4) |
|                                       |                      | O(7)-Tb(1)-N(1)   | 68.1(4)  |
|                                       |                      | O(12)-Tb(1)-N(1)  | 72.5(4)  |
|                                       |                      | O(11)-Tb(1)-N(1)  | 133.6(4) |
|                                       |                      | O(13)-Tb(1)-N(1)  | 68.6(5)  |
|                                       |                      | N(2)-Tb(1)-N(1)   | 61.5(5)  |
| Coordination environment<br>around Ni | Bond length[Å]       | Bond angels [°]   |          |
|                                       | O(8)-Ni(2) 2.001(8)  | Ni(2)-O(4)-Ni(1)  | 96.1(4)  |
|                                       | O(8)-Ni(3) 2.087(8)  | Ni(4)-O(6)-Ni(1)  | 101.8(4) |
|                                       | O(8)-Ni(4) 2.388(10) | Ni(2)-O(8)-Ni(3)  | 103.0(4) |
|                                       | O(9)-Ni(4) 2.062(9)  | Ni(2)-O(8)-Ni(4)  | 92.5(4)  |
|                                       | O(9)-Ni(3) 2.261(9)  | Ni(3)-O(8)-Ni(4)  | 91.8(3)  |

|                                                                                    |               |                 |                   |          |
|------------------------------------------------------------------------------------|---------------|-----------------|-------------------|----------|
| 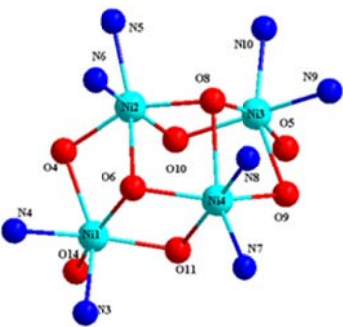  | O(10)-Ni(3)   | 2.054(9)        | Ni(4)-O(9)-Ni(3)  | 96.2(4)  |
|                                                                                    | O(10)-Ni(2)   | 2.104(9)        | Ni(3)-O(10)-Ni(2) | 100.6(4) |
|                                                                                    | O(11)-Ni(1)   | 2.049(10)       | Ni(1)-O(11)-Ni(4) | 102.2(4) |
|                                                                                    | O(11)-Ni(4)   | 2.058(8)        | Ni(1)-O(11)-Tb(1) | 114.2(4) |
|                                                                                    | O(4)-Ni(2)    | 1.990(9)        | Ni(4)-O(11)-Tb(1) | 111.1(4) |
|                                                                                    | O(4)-Ni(1)    | 2.244(10)       | N(4)-Ni(1)-O(11)  | 169.5(5) |
|                                                                                    | O(5)-Ni(3)#1  | 2.006(9)        | N(4)-Ni(1)-N(3)   | 78.4(5)  |
|                                                                                    | O(6)-Ni(4)    | 2.038(9)        | O(11)-Ni(1)-N(3)  | 92.8(5)  |
|                                                                                    | O(6)-Ni(1)    | 2.082(8)        | N(4)-Ni(1)-O(14)  | 98.8(4)  |
|                                                                                    | N(3)-Ni(1)    | 2.061(13)       | O(11)-Ni(1)-O(14) | 87.4(4)  |
|  | N(4)-Ni(1)    | 1.977(11)       | N(3)-Ni(1)-O(14)  | 94.8(5)  |
|                                                                                    | N(5)-Ni(2)    | 2.084(11)       | N(4)-Ni(1)-O(6)   | 98.2(4)  |
|                                                                                    | N(6)-Ni(2)    | 1.983(11)       | O(11)-Ni(1)-O(6)  | 77.6(3)  |
|                                                                                    | N(7)-Ni(4)    | 2.043(12)       | N(3)-Ni(1)-O(6)   | 99.5(5)  |
|                                                                                    | N(8)-Ni(4)    | 2.026(11)       | O(14)-Ni(1)-O(6)  | 159.7(4) |
|                                                                                    | N(9)-Ni(3)    | 1.955(11)       | N(4)-Ni(1)-O(4)   | 76.1(4)  |
|                                                                                    | N(10)-Ni(3)#1 | 2.07(12)        | O(11)-Ni(1)-O(4)  | 112.5(4) |
|                                                                                    |               |                 | N(3)-Ni(1)-O(4)   | 154.5(4) |
|                                                                                    |               |                 | O(14)-Ni(1)-O(4)  | 90.1(4)  |
|                                                                                    |               |                 | O(6)-Ni(1)-O(4)   | 83.2(3)  |
|                                                                                    |               | N(6)-Ni(2)-O(4) | 96.1(4)           |          |
|                                                                                    |               | N(6)-Ni(2)-O(8) | 97.7(4)           |          |
|                                                                                    |               | O(4)-Ni(2)-O(8) | 152.6(4)          |          |

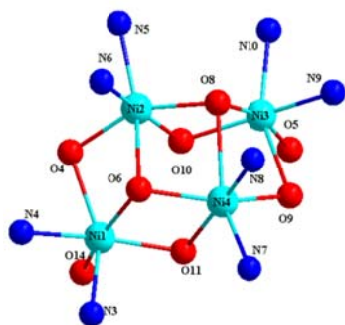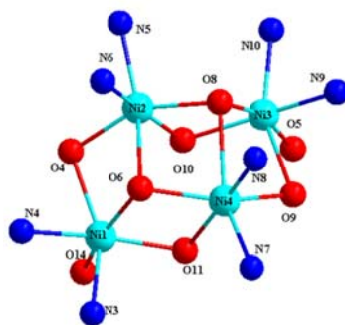

|                      |          |
|----------------------|----------|
| N(6)-Ni(2)-N(5)      | 79.3(4)  |
| O(4)-Ni(2)-N(5)      | 104.6(4) |
| O(8)-Ni(2)-N(5)      | 101.2(4) |
| N(6)-Ni(2)-O(10)     | 173.6(4) |
| O(4)-Ni(2)-O(10)     | 87.3(4)  |
| O(8)-Ni(2)-O(10)     | 77.0(3)  |
| N(5)-Ni(2)-O(10)     | 105.1(4) |
| N(9)-Ni(3)-O(5)#1    | 98.9(4)  |
| N(9)-Ni(3)-O(10)     | 168.6(4) |
| O(5)#1-Ni(3)-O(10)   | 91.0(4)  |
| N(9)-Ni(3)-N(10)#1   | 77.9(5)  |
| O(5)#1-Ni(3)-N(10)#1 | 95.0(4)  |
| O(10)-Ni(3)-N(10)#1  | 106.9(4) |
| N(9)-Ni(3)-O(8)      | 92.8(4)  |
| O(5)#1-Ni(3)-O(8)    | 162.7(4) |
| O(10)-Ni(3)-O(8)     | 76.2(3)  |
| N(10)#1-Ni(3)-O(8)   | 99.8(4)  |
| N(9)-Ni(3)-O(9)      | 76.7(4)  |
| O(5)#1-Ni(3)-O(9)    | 87.8(4)  |
| O(10)-Ni(3)-O(9)     | 98.3(3)  |
| N(10)#1-Ni(3)-O(9)   | 154.6(4) |
| O(8)-Ni(3)-O(9)      | 82.6(3)  |
| N(8)-Ni(4)-O(6)      | 96.2(4)  |

|  |                  |          |
|--|------------------|----------|
|  | N(8)-Ni(4)-N(7)  | 79.3(5)  |
|  | O(6)-Ni(4)-N(7)  | 106.9(4) |
|  | N(8)-Ni(4)-O(11) | 171.1(4) |
|  | O(6)-Ni(4)-O(11) | 78.4(4)  |
|  | N(7)-Ni(4)-O(11) | 95.4(5)  |
|  | N(8)-Ni(4)-O(9)  | 99.8(4)  |
|  | O(6)-Ni(4)-O(9)  | 151.8(4) |
|  | N(7)-Ni(4)-O(9)  | 98.9(4)  |
|  | O(11)-Ni(4)-O(9) | 88.0(4)  |
|  | N(8)-Ni(4)-O(8)  | 74.0(4)  |
|  | O(6)-Ni(4)-O(8)  | 82.2(3)  |
|  | N(7)-Ni(4)-O(8)  | 152.6(4) |
|  | O(11)-Ni(4)-O(8) | 111.9(3) |
|  | O(9)-Ni(4)-O(8)  | 80.1(3)  |

Symmetry transformations used to generate equivalent atoms:

#1 -x+1,-y+2,-z

## REFERENCES

<sup>i</sup>A. D. Becke, *Physical Review A*, 1988, **38**, 3098.

<sup>ii</sup>A. D. Becke, *Journal of Chemical Physics*, 1993, **98**, 5648.

<sup>iii</sup>C. T. Lee, W. T. Yang and R. G. Parr, *Physical Review B*, 1988, **37**, 785.

<sup>iv</sup>M. J. Frisch et al.; Gaussian 09 (Revision B.01) ed.; Gaussian, Inc: Pittsburgh, PA, 2009.

<sup>v</sup>E. Ruiz, J. Cano, S. Alvarez and P. Alemany, *J. Am. Chem. Soc.*, 1998, **120**, 11122.

<sup>vi</sup>E. Ruiz, J. Cano, S. Alvarez and P. Alemany, *J. Comput. Chem.*, 1999, **20**, 1391.

<sup>vii</sup>E. Ruiz, A. Rodriguez-Forte, J. Cano, S. Alvarez and P. Alemany, *J. Comput. Chem.*, 2003, **24**, 982 and references therein.

- 
- <sup>viii</sup>A.Schafer, H.Hornand R. Ahlrichs, *Journal of Chemical Physics.*,1992, **97**, 2571.
- <sup>ix</sup>A.Schafer, C.HuberandR. Ahlrichs, *Journal of Chemical Physics.*,1994, **100**, 5829.
- <sup>x</sup>T. H.Dunning Jr. and P. J. Hay,in *Modern Theoretical Chemistry*, Ed. H. F. Schaefer III, Vol. 3 (Plenum, New York, 1976) 1-28.
- <sup>xi</sup>Hay, P. J.; Wadt, W. R. “Ab initio effective core potentials for molecular calculations - potentials for the transition-metal atoms Sc to Hg,” *J. Chem. Phys.*, 1985,**82**, 270.
- <sup>xii</sup>W. R.Wadtand P. J. Hay, “Ab initio effective core potentials for molecular calculations - potentials for main group elements Na to Bi,” *J. Chem. Phys.*, 1985, **82**, 284.
- <sup>xiii</sup>P. J.Hay andW. R. Wadt, “Ab initio effective core potentials for molecular calculations - potentials for K to Au including the outermost core orbitals,” *J. Chem. Phys.*, 1985, **82**, 299.
- <sup>xiv</sup>T.Nakajima andK. Hirao, *J. Chem. Phys.* 2002, **116**, 8270.
- <sup>xv</sup>R.DitchfieldW. J.Hehreand J. A.Pople, “Self-Consistent Molecular Orbital Methods.9. Extended Gaussian-type basis for molecular-orbital studies of organic molecules,” *J. Chem. Phys.*, 1971, **54**, 724.
- <sup>xvi</sup>W. J.Hehre, R.Ditchfield andJ. A. Pople, “Self-Consistent Molecular Orbital Methods.12. Further extensions of Gaussian-type basis sets for use in molecular-orbital studies of organic-molecules,” *J. Chem. Phys.*, 1972,**56**, 2257.
- <sup>xvii</sup>P. C.Hariharan andJ. A. Pople, “Influence of polarization functions on molecular-orbital hydrogenation energies,” *Theor.Chem. Acc.*, 1973,**28**, 213.
- <sup>xviii</sup>M. S. Gordon, “The isomers of silacyclopropane,” *Chem. Phys. Lett.*, 1980,**76**, 163.
- <sup>xix</sup>M. M.Francl, W. J.Pietro, W. J.Hehre, J. S.Binkley, D. J.DeFrees, J. A.Popleand M. S. Gordon, “Self-Consistent Molecular Orbital Methods. 23. A polarization-type basis set for 2nd-row elements,” *J. Chem. Phys.*, 1982,**77**, 3654.
- <sup>xx</sup>R. C.Binning Jr.and L. A.Curtiss,; “Compact contracted basis-sets for 3rd-row atoms - GA-KR,” *J. Comp. Chem.*, 1990,**11**, 1206.
- <sup>xxi</sup>J.-P.Blaudeau, M. P.McGrath, L. A.CurtissandL. Radom, “Extension of Gaussian-2 (G2) theory to molecules containing third-row atoms K and Ca,” *J. Chem. Phys.*, 1997, **107**, 5016.
- <sup>xxii</sup> V. A.Rassolov, A.J. Pople, M. A.Ratnerand T. L.Windus, “6-31G\* basis set for atoms K through Zn,” *J. Chem. Phys.*, 1998,**109**, 1223.

---

<sup>xxiii</sup>V. A. Rassolov, M. A. Ratner, J. A. Pople, P. C. Redfern and L. A. Curtiss, "6-31G\* Basis Set for Third-Row Atoms," *J. Comp. Chem.*, 2001, **22**, 976.

<sup>xxiv</sup>M.E. Rose, *Elementary Theory of Angular Momentum* John Wiley & Sons, Inc., New York, NY, 1957.

<sup>xxv</sup>(a) E. P. Wigner, *Group Theory and Its Application to the Quantum Mechanics of Atomic Spectra, expanded and improved ed.* New York: Academic Press, 1959. (b) C. Eckart, "The Application of Group Theory to the Quantum Dynamics of Monoatomic Systems" *Rev. Mod. Phys.* 1930, **2**, 305-380.

<sup>xxvi</sup>J. Cano, VPMAG package; University of Valencia, Valencia, Spain, 2003.

<sup>xxvii</sup>(a) I. D. Brown and D. Altermatt, *Acta Cryst.*, 1985, **B41**, 244. (b) I. D. Brown, *Chem. Rev.* 2009, **109**, 6858. (a) I. D. Brown and D. Altermatt, *Acta Cryst.*, 1985, **B41**, 244.
